# Supplementary material
Source: PubMed Central journal article supplement (PMC3918466)
Supplement: NIHMS541416-supplement-01.pdf [file NIHMS541416-supplement-01.pdf]

**Supplemental Table 1. Oligonucleotide primers used for RT-PCR**

| Gene                                   | Forward Primer           | Reverse Primer         |
|----------------------------------------|--------------------------|------------------------|
| MafA cds<br>(endogenous + transgene)   | CTTCAGCAAGGAGGAGGTCATC   | GCGTAGCCGCGGTTCTT      |
| Endogenous MafA<br>(primers in 3' UTR) | CGGGAACGGTGATTGCTTAG     | GGAGGTTGGGACGCAGAA     |
| MafB                                   | GAAGGCCGCGAGGCTTAT       | GGCCCTGGCACTCACAAA     |
| Neurog3                                | GCGCTCACCATCCAAGTGT      | CTCGGCAGTCACCCACTTCT   |
| Insm1                                  | TTCGCTGTGTTTCATGGTCTAGAA | AACAACCCGTACGCTACAGACA |
| NeuroD1                                | AAAGCCACGGATCAATCTTCTC   | GCGAATGGCTATCGAAAGACA  |
| Insulin                                | CTTCAGACCTTGGCGTTGGA     | ATGCTGGTGCAGCACTGATC   |
| Glucagon                               | GAATGAAGACAAACGCCACTCA   | CGGCGGGAGTCGAGGTA      |
| Somatostatin                           | ATGCTGTCTGCCGTCTC        | TTCTCTGTCTGGTTGGGCTC   |

**Supplemental Table 2. Microarray data show significant reduction in hormones and endocrine transcription factor expression in  $TT^{endo}$  animals.** P0 RNA from control (n=4) and  $TT^{endo}$  (n=3) pancreas was biotinylated and hybridized to Affymetrix array MG430 2.0. Gene expression data from each array was normalized using the MAS5 algorithm via the Affymetrix gene-expression console. Normalized and scaled data was used to quantify relative gene expression. The results showed specific inhibition of endocrine hormone and transcription factor expression in pancreas from pups expressing MafA<sup>Myc</sup> from E7.5 to P0. Furthermore, expression of some of the genes for secretory granule proteins was altered, while the expression of genes for acinar/duct proteins was unaltered.

Supplemental Table 2

| <b>Genes</b>                             | <b>Mean Controls</b> | <b>Mean TT<sup>endo</sup></b> | <b>Relative Expression</b> | <b>p.value</b> |
|------------------------------------------|----------------------|-------------------------------|----------------------------|----------------|
| <b><u>Hormones</u></b>                   |                      |                               |                            |                |
| Somatostatin, Sst                        | 4552                 | 377                           | 0.08                       | 3.00E-05       |
| IAPP                                     | 8659                 | 869                           | 0.10                       | 1.10E-04       |
| Insulin I, Ins1                          | 24558                | 2944                          | 0.12                       | 1.00E-05       |
| Insulin II, Ins2                         | 21835                | 2669                          | 0.12                       | 1.00E-05       |
| Glucagon, Gcg                            | 13258                | 1707                          | 0.13                       | 6.00E-05       |
| Peptide YY, Pyy                          | 6312                 | 1358                          | 0.22                       | 1.20E-04       |
| Ghrelin, Ghrl                            | 645                  | 263                           | 0.41                       | 8.30E-04       |
| Ppy                                      | 1421                 | 659                           | 0.46                       | 4.01E-03       |
| <b><u>Acinar/duct enriched genes</u></b> |                      |                               |                            |                |
| Amylase 2,                               | 30177                | 29278                         | 0.97                       | 0.12           |
| Elastase 2A                              | 32596                | 321545                        | 0.99                       | 0.24           |
| Elastase 3                               | 31261                | 31317                         | 1.00                       | 0.83           |
| Elastase 1 Ela1                          | 21576                | 21630                         | 1.00                       | 0.94           |
| ChymotrypsinogenB1                       | 31315                | 31388                         | 1.00                       | 0.82           |
| Sox9                                     | 373                  | 414                           | 1.11                       | 0.11           |
| Hnf1 $\beta$                             | 263                  | 245                           | 0.93                       | 0.23           |
| Muc1                                     | 1409                 | 1679                          | 1.19                       | 0.26           |
| Carbonic anhydrase2                      | 228                  | 246                           | 1.08                       | 0.50           |
| <b><u>Secretory Granule genes</u></b>    |                      |                               |                            |                |
| ChromograninA                            | 3978                 | 4429                          | 1.11                       | 0.41           |
| Synaptophysin, Syp                       | 209                  | 226                           | 1.08                       | 0.50           |
| Synaptotagmin-like 4                     | 545                  | 215                           | 0.39                       | 1.01E-03       |
| Secretogranin III                        | 1424                 | 590                           | 0.41                       | 1.96E-03       |
| ChromograninB                            | 2935                 | 1513                          | 0.52                       | 0.02           |
| <b><u>Transcription Factors</u></b>      |                      |                               |                            |                |
| Neurod1                                  | 692                  | 177                           | 0.26                       | 8.00E-05       |
| Pax6                                     | 391                  | 128                           | 0.33                       | 3.60E-04       |
| Isl1                                     | 1087                 | 473                           | 0.44                       | 2.74E-03       |
| MafB                                     | 394                  | 196                           | 0.50                       | 2.00E-05       |
| Insm1                                    | 312                  | 197                           | 0.63                       | 0.01           |
| Arx                                      | 186                  | 119                           | 0.64                       | 6.40E-04       |
| Nkx2-2                                   | 278                  | 189                           | 0.68                       | 2.27E-03       |
| Pdx1                                     | 301                  | 211                           | 0.70                       | 2.16E-03       |
| Neurog3                                  | 390                  | 331                           | 0.85                       | 0.01           |
